# Supplementary figures and images for: Cognitive experience alters cortical involvement in goal-directed navigation
Source: eLife journal article supplement (doi:10.7554/elife.76051), 2022-06-23

Figure 4—figure supplement 3

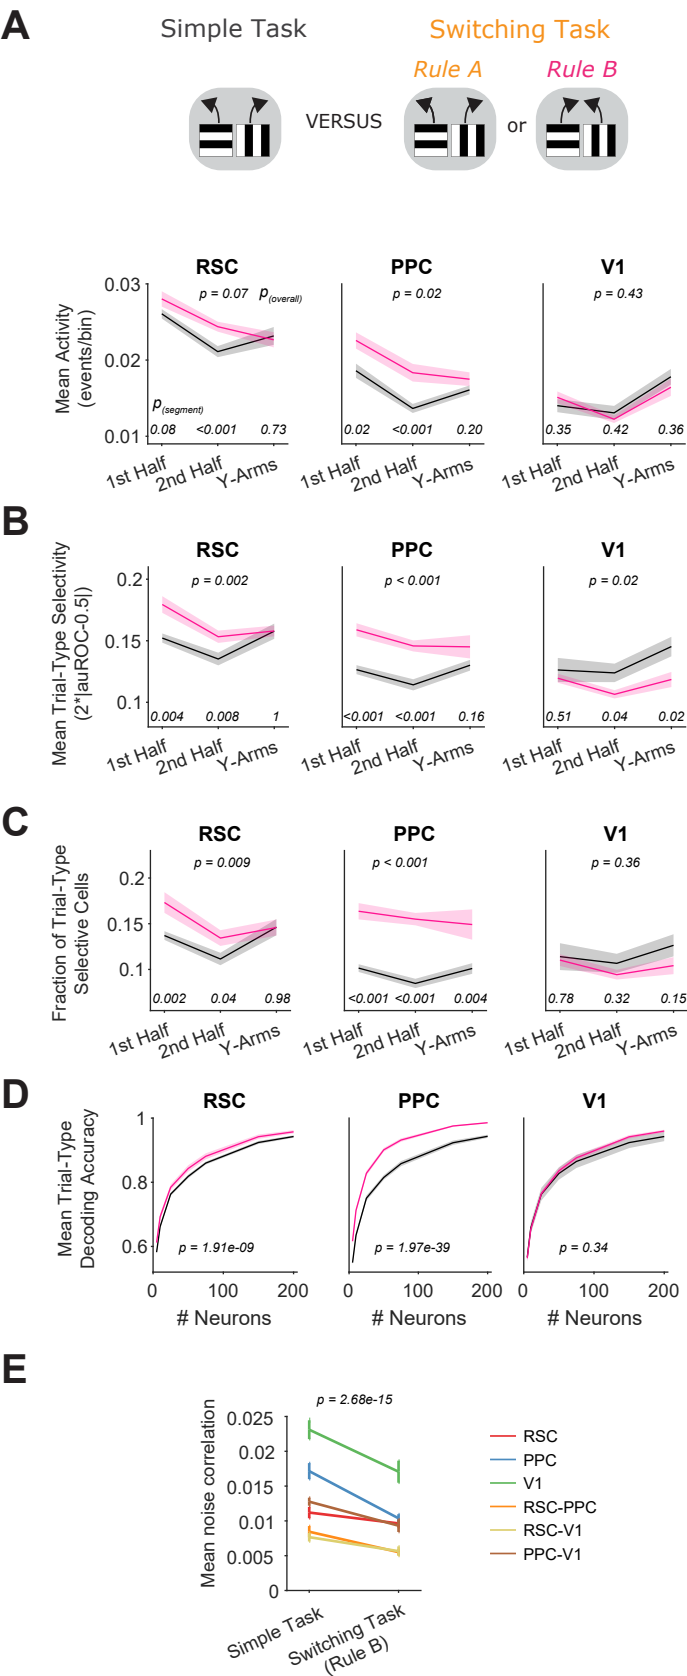

Supplement: supp [file elife-76051-supp-v1.zip]

Figure 3—figure supplement 1

**A**

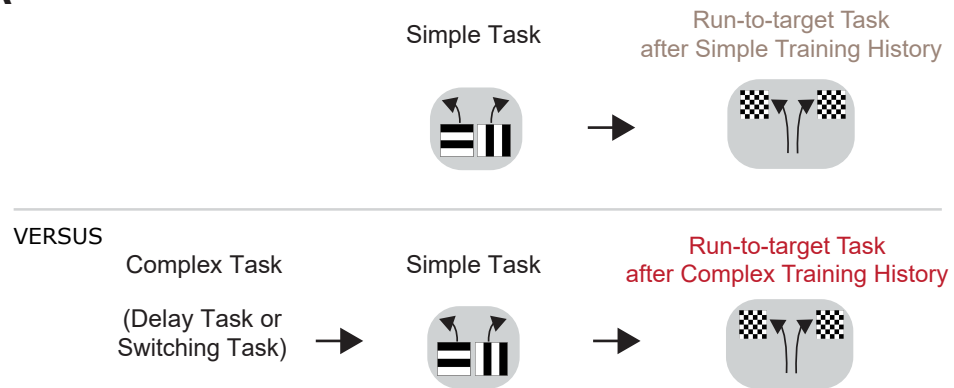

**B**

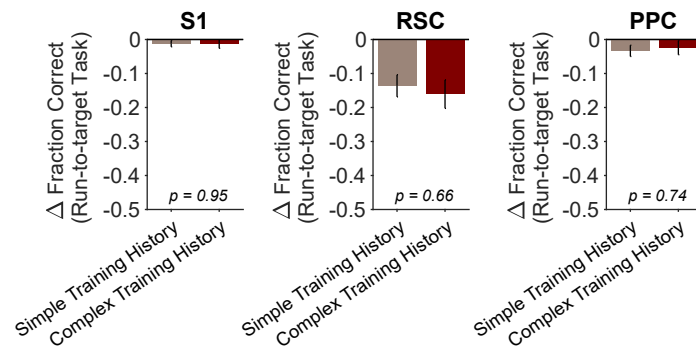

Supplement: supp [file elife-76051-supp-v1.zip]

Figure 4—figure supplement 1

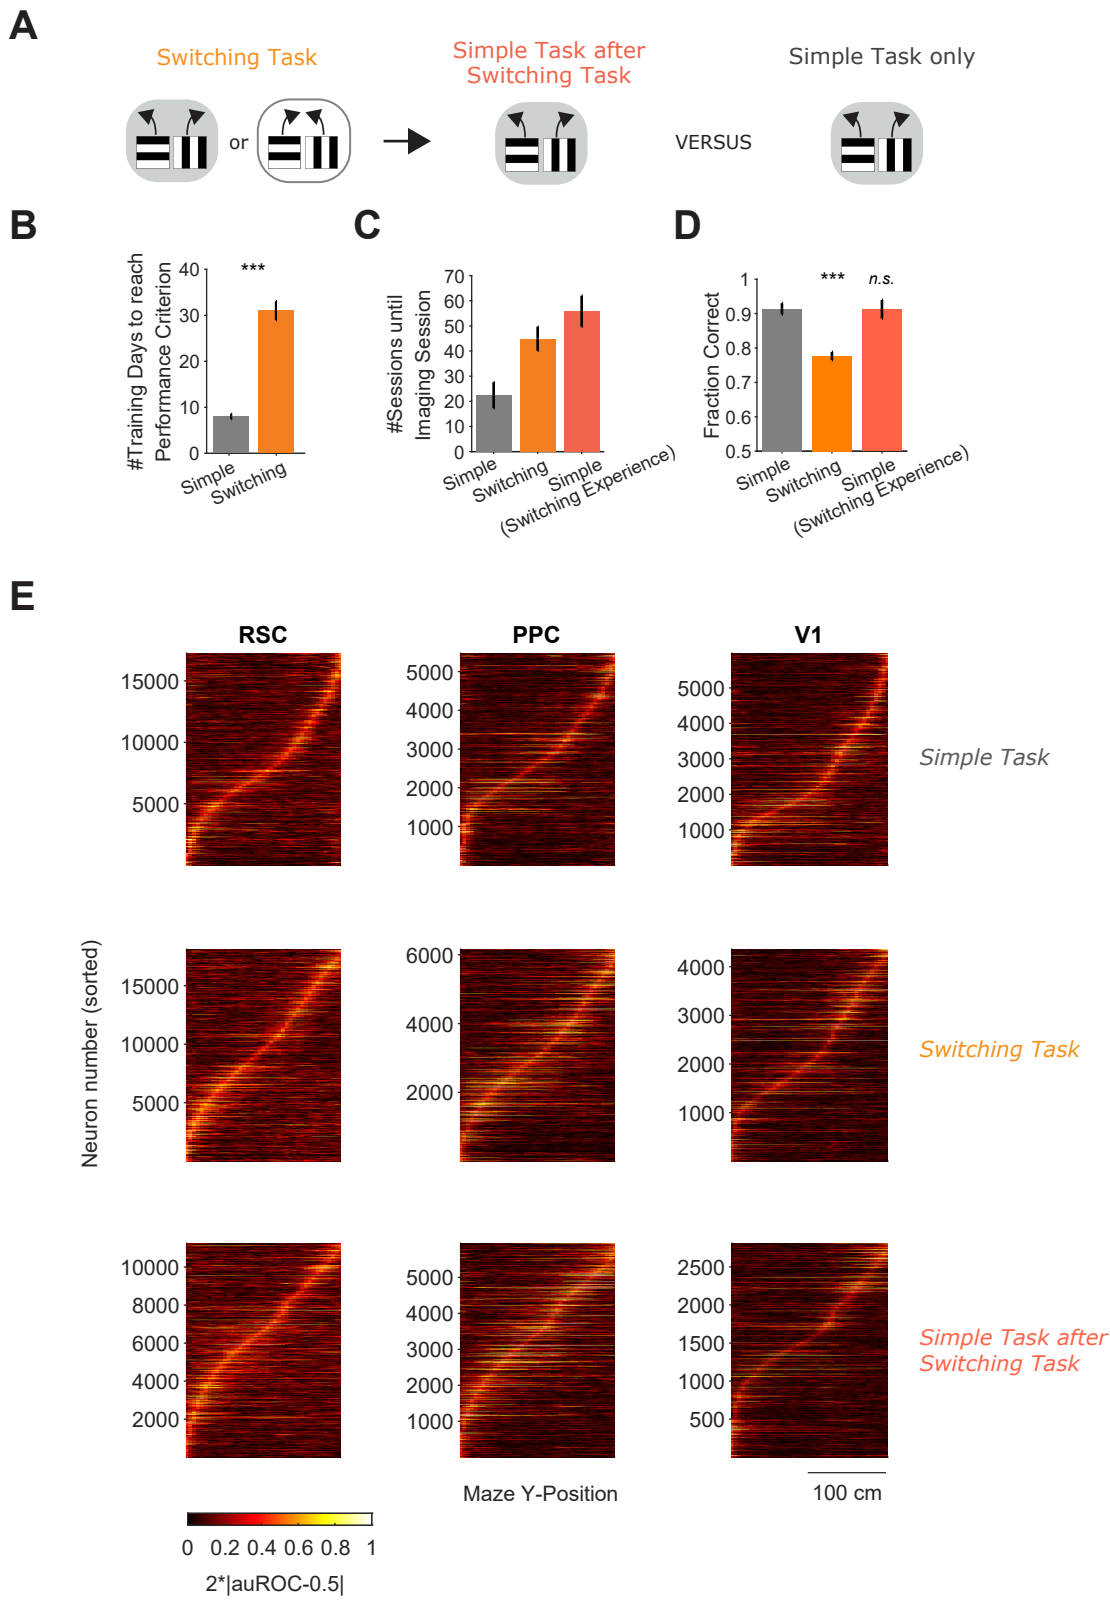

Supplement: supp [file elife-76051-supp-v1.zip]

Figure 4—figure supplement 4

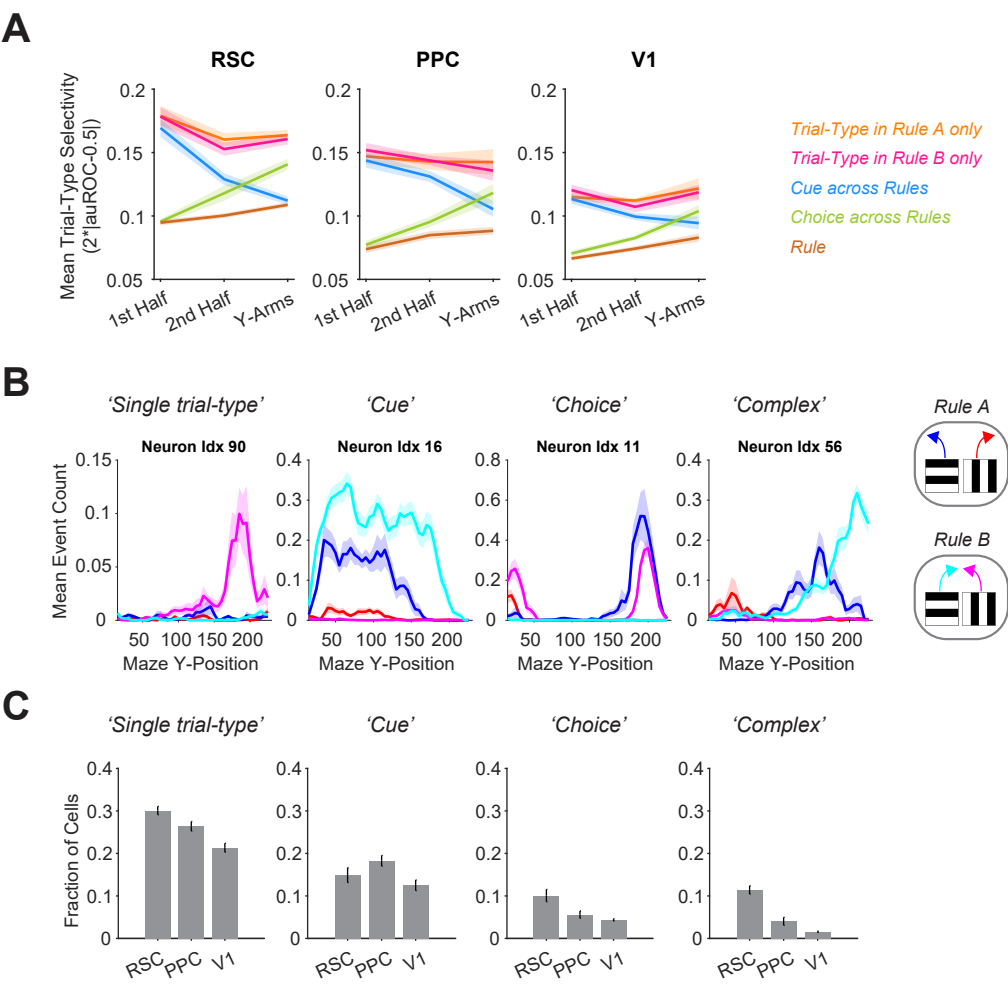

Supplement: supp [file elife-76051-supp-v1.zip]

Figure 1—figure supplement 2

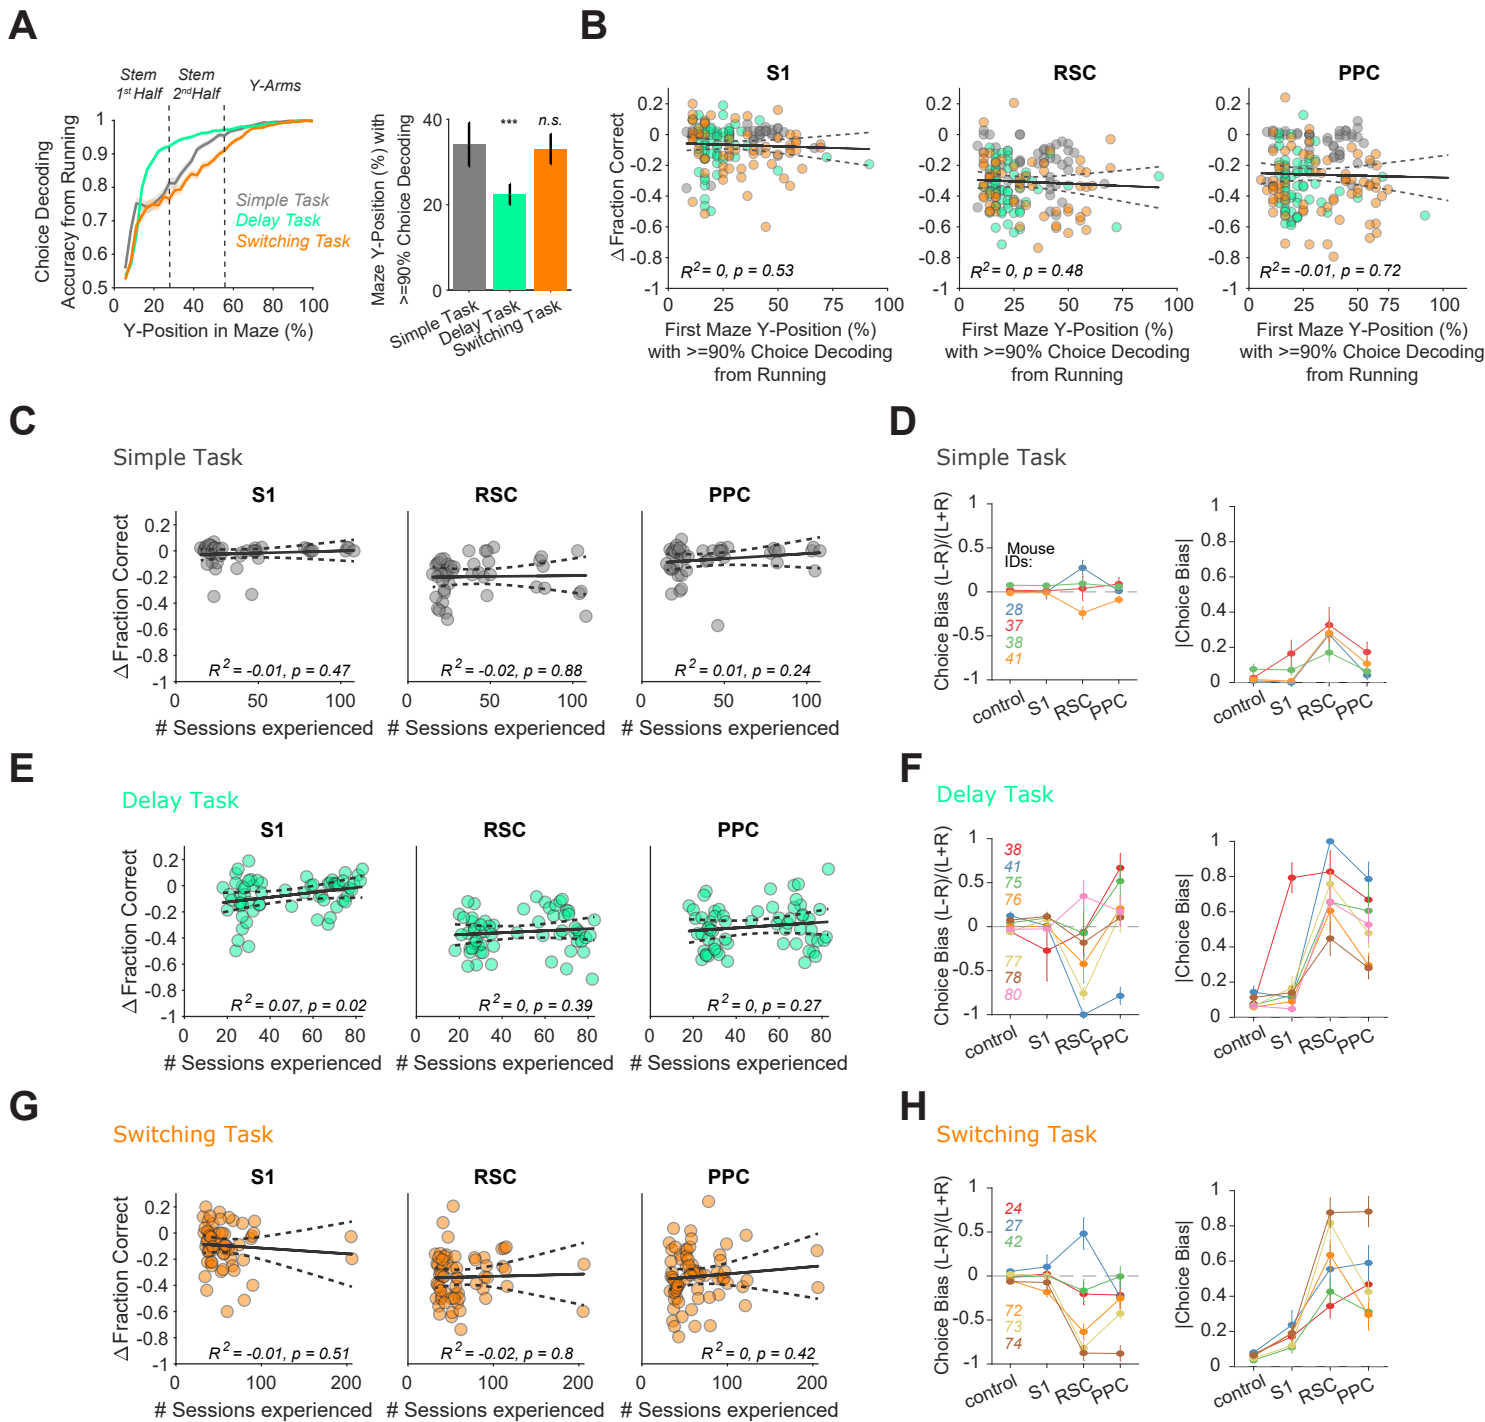

Supplement: supp [file elife-76051-supp-v1.zip]

Figure 1—figure supplement 3

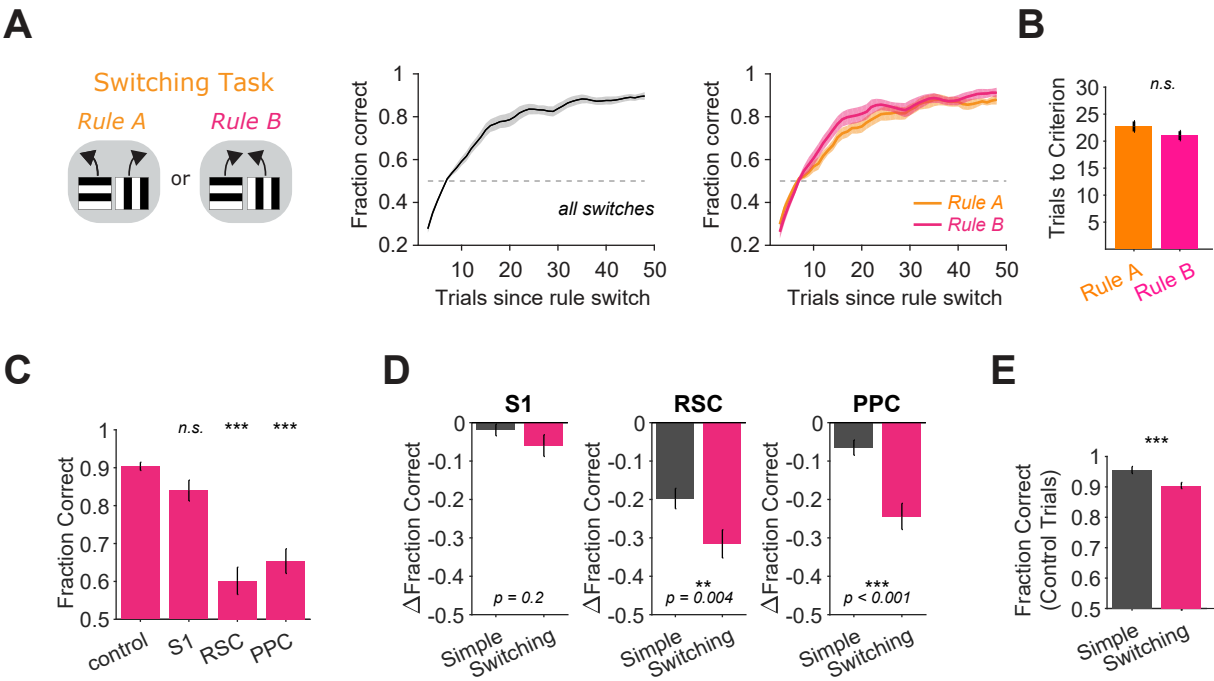

Supplement: supp [file elife-76051-supp-v1.zip]

**Figure 2—figure supplement 1**

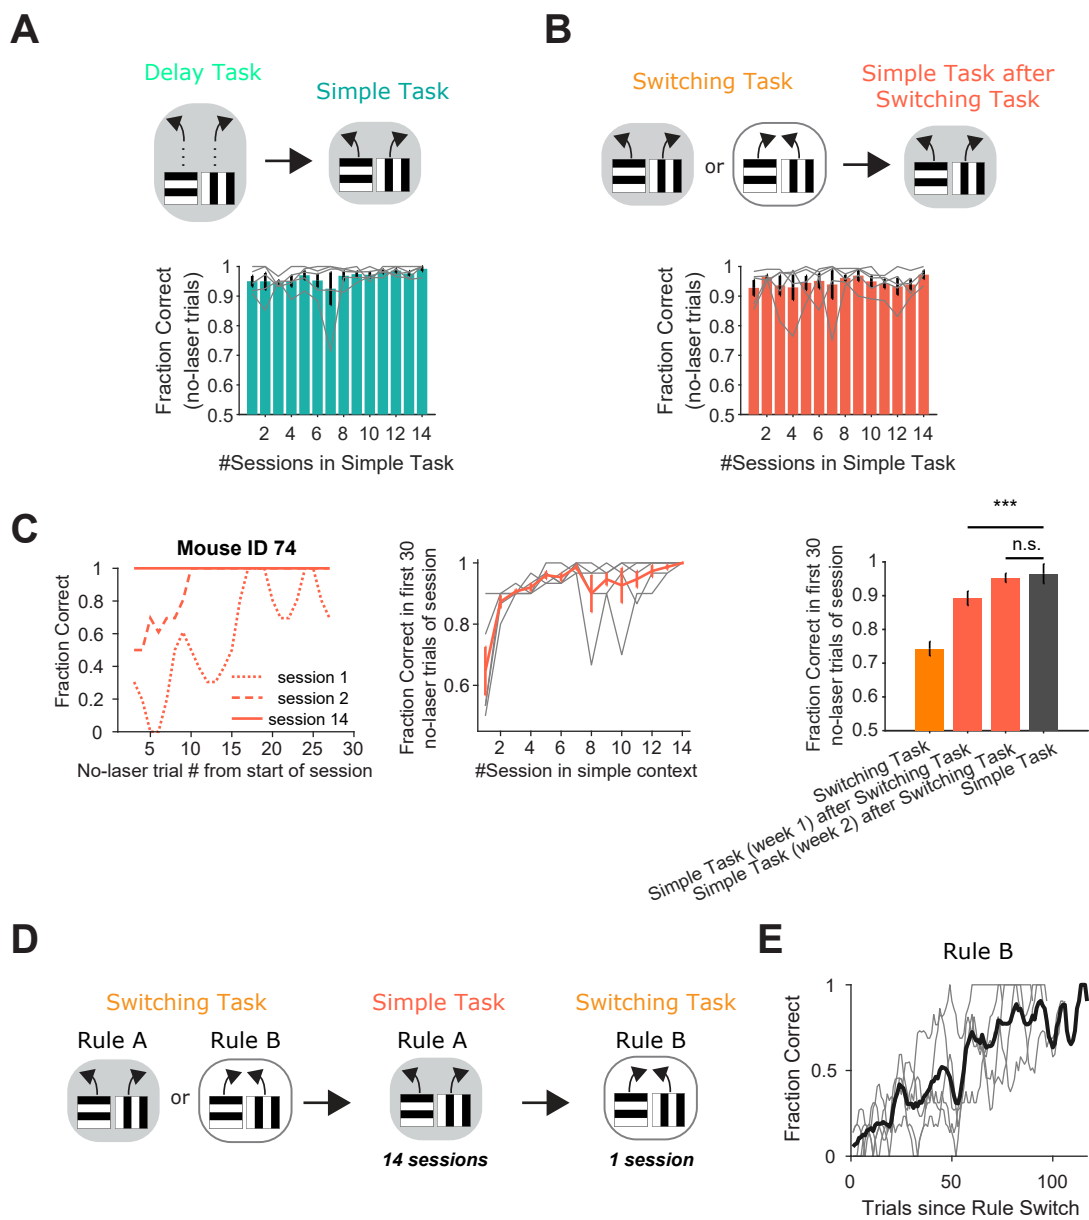

Supplement: supp [file elife-76051-supp-v1.zip]

Figure 1—figure supplement 1

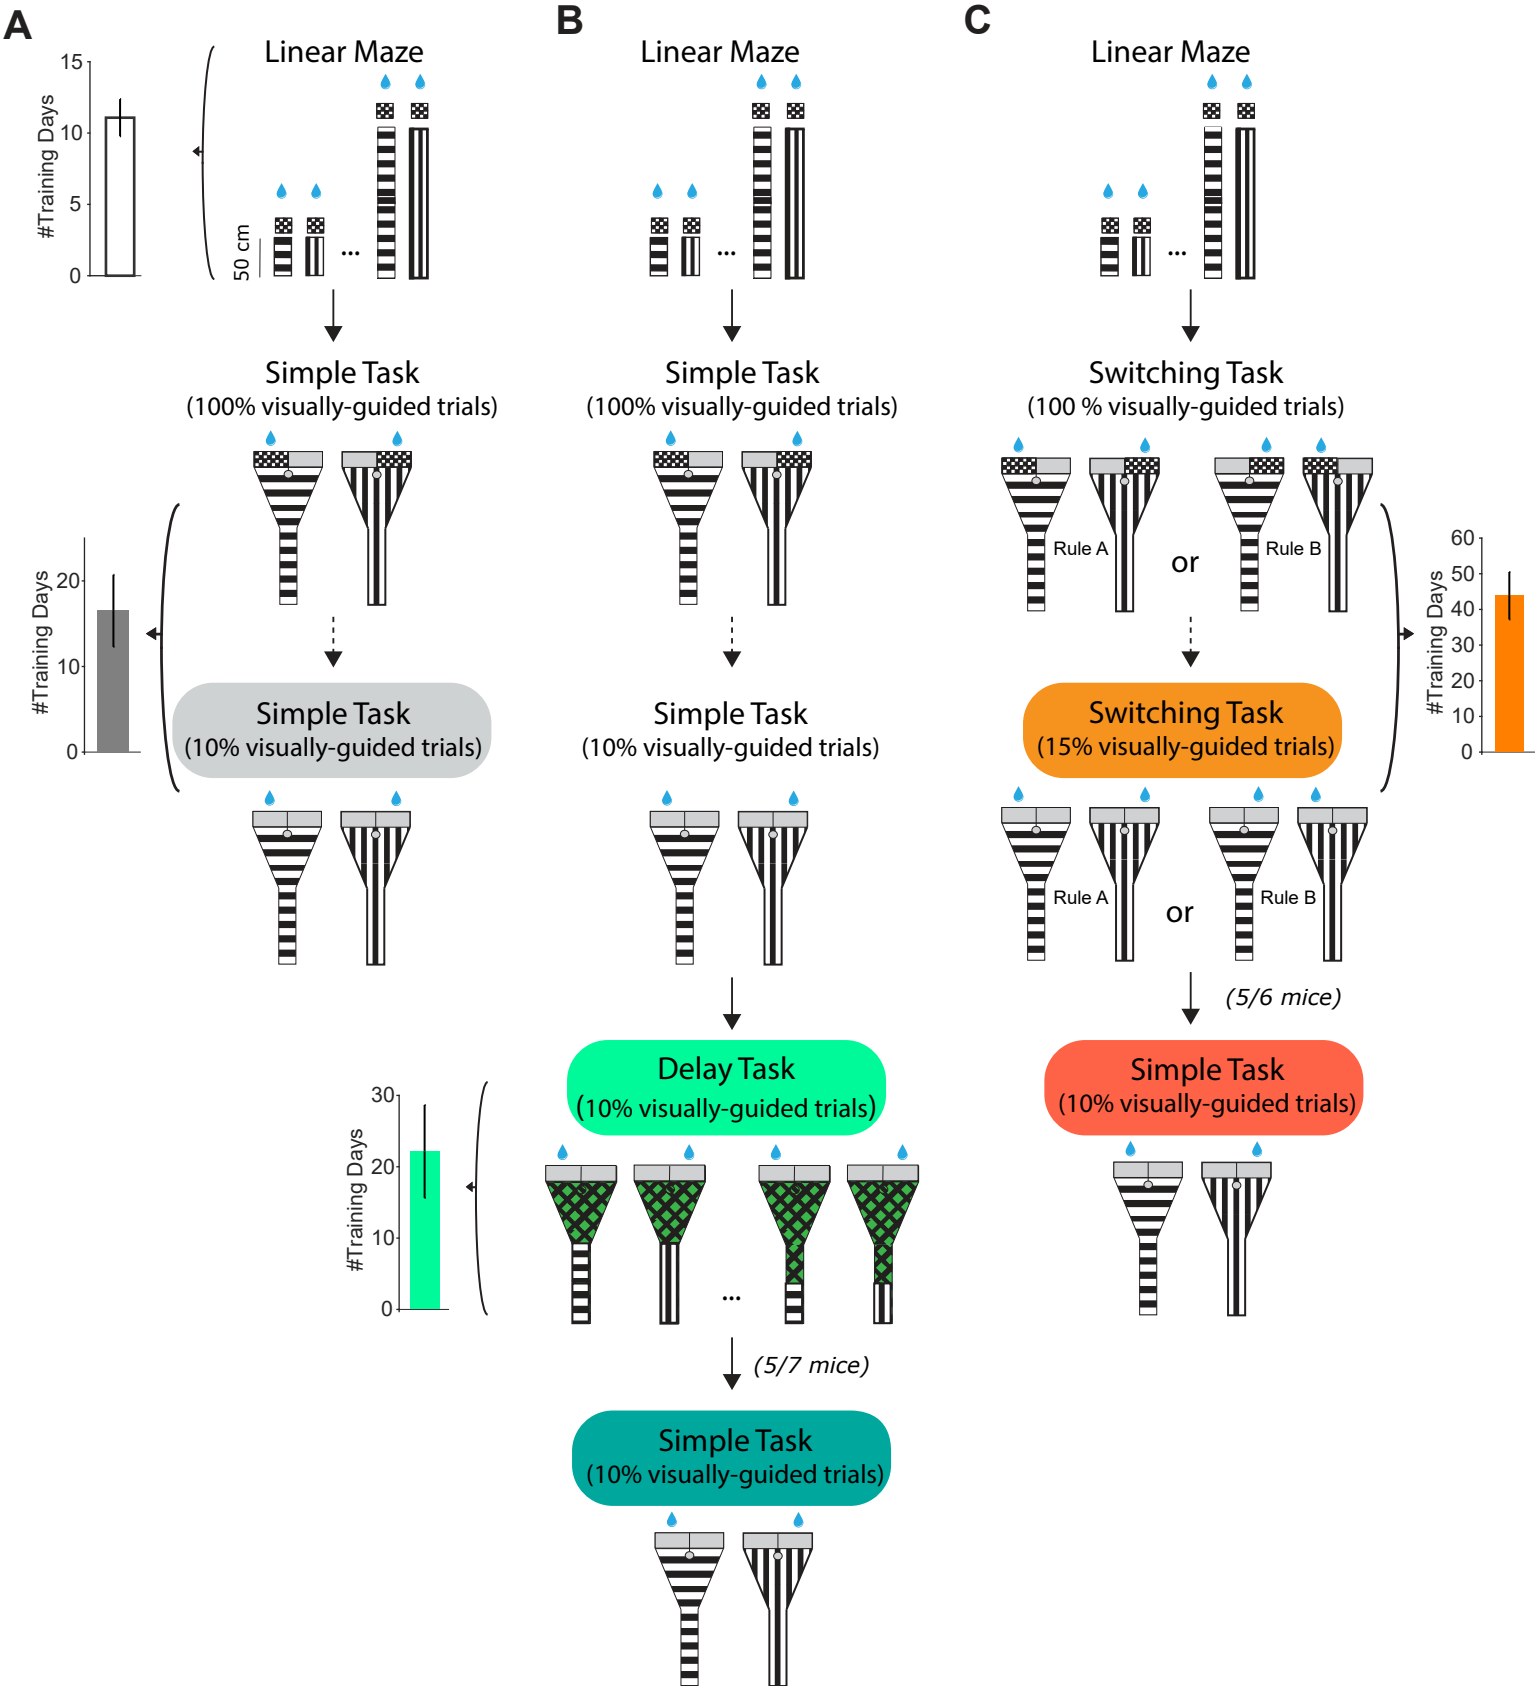

Supplement: supp [file elife-76051-supp-v1.zip]

Figure 1—figure supplement 4

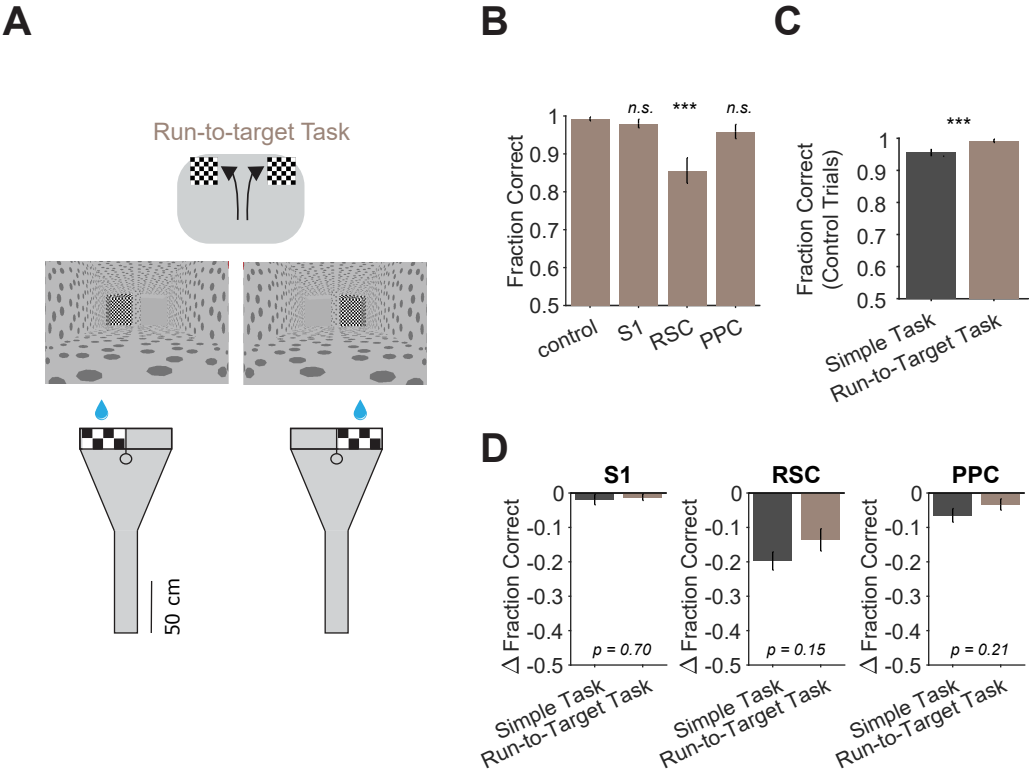

Supplement: supp [file elife-76051-supp-v1.zip]

Figure 4—figure supplement 2

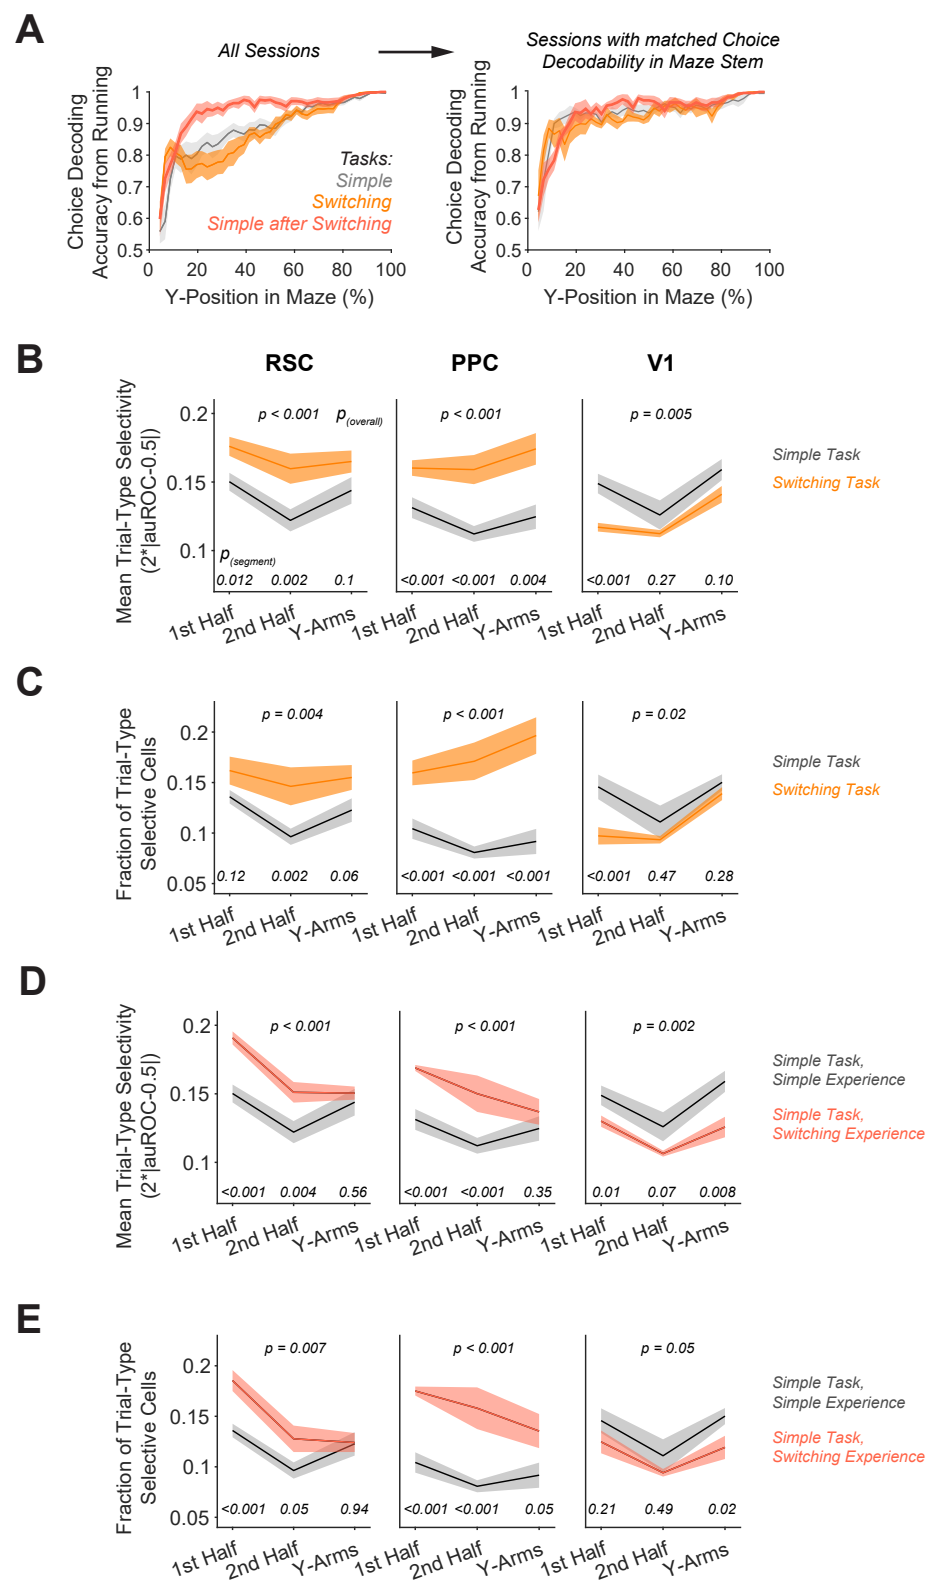

Supplement: supp [file elife-76051-supp-v1.zip]
